# Supplementary material for: Bio-Guided Isolation of Prospective Bioactive Constituents from Roots of Clausena indica (Dalzell) Oliv
Source: MDPI journal article supplement (doi:10.3390/molecules24244442), 2019-12-04
Supplement: s1 [file s1]

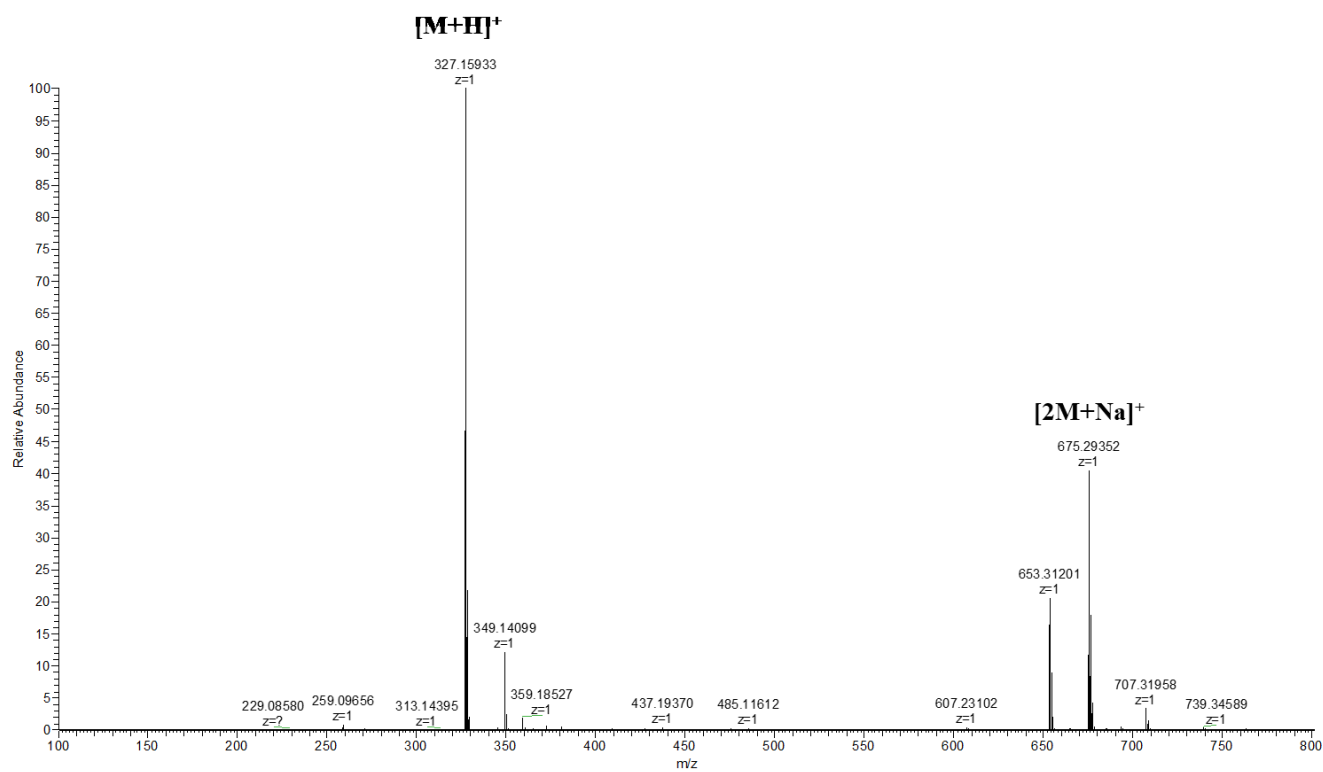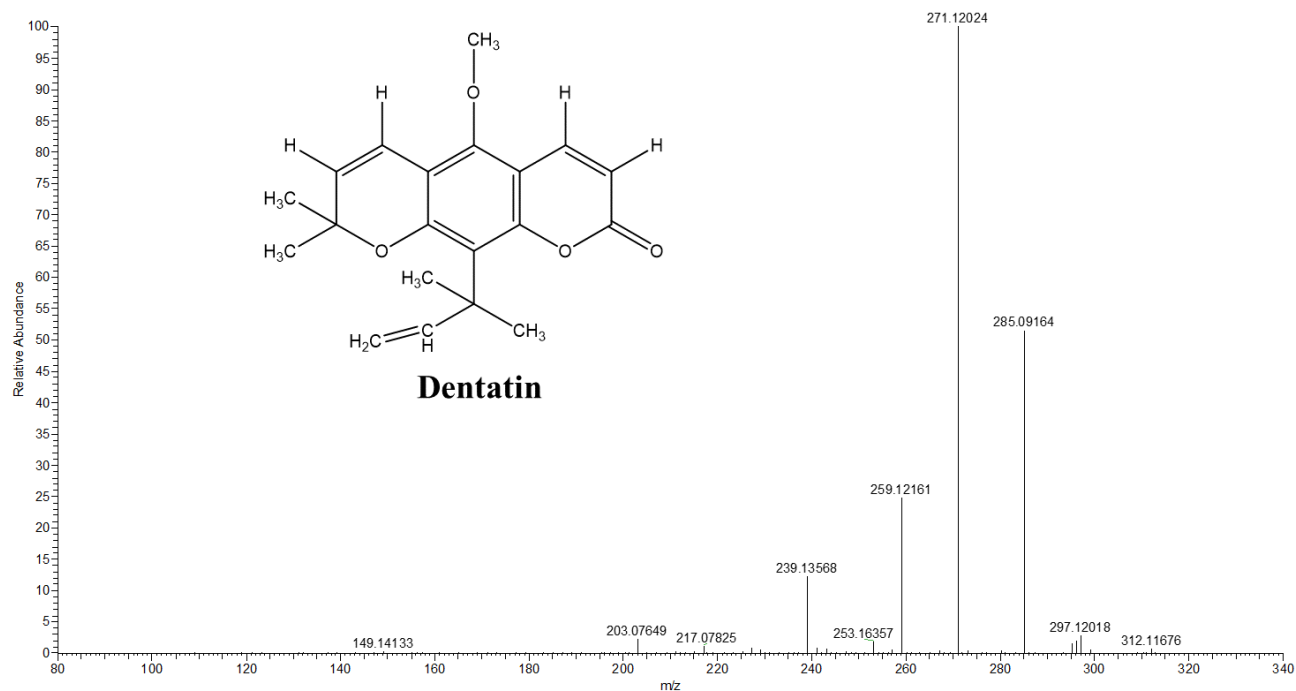

**Figure S1.** Total ion chromatography (upper) and tandem mass spectrometry (MS-MS) spectrum (lower) of dentatin by a positive model

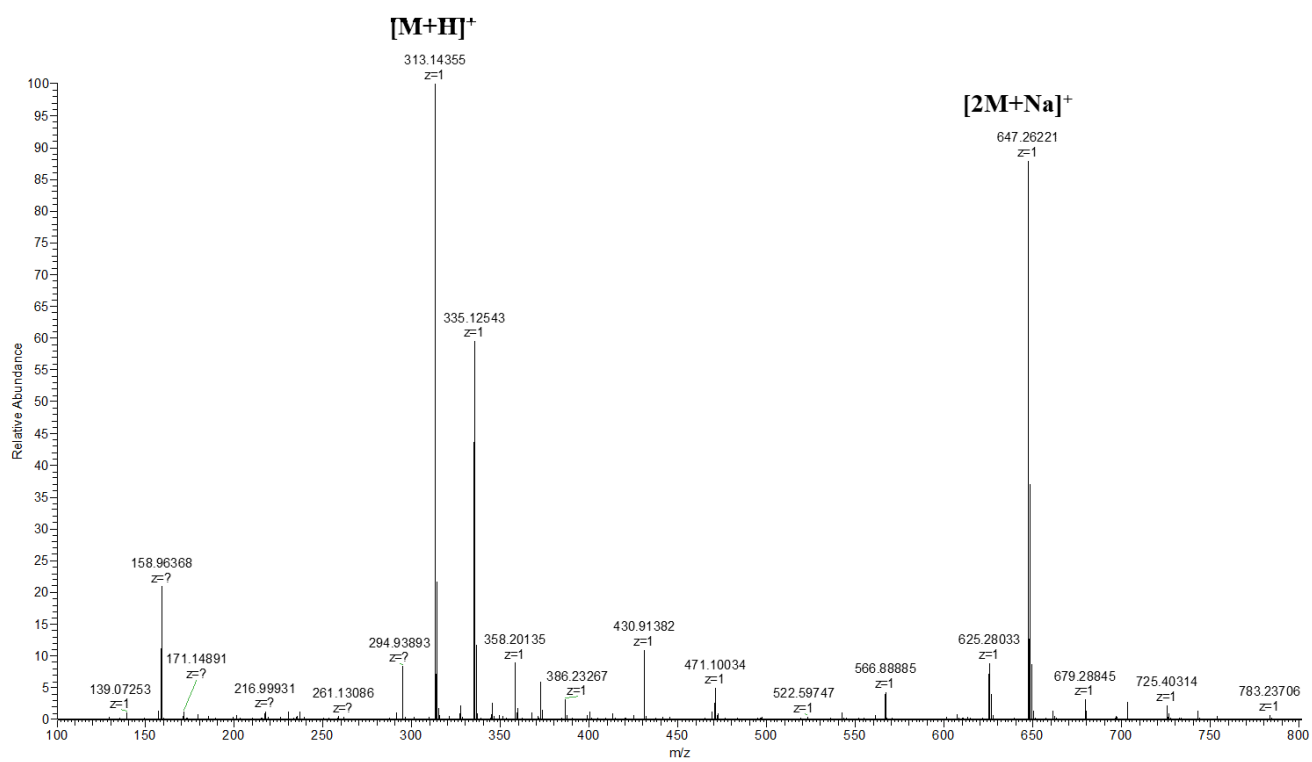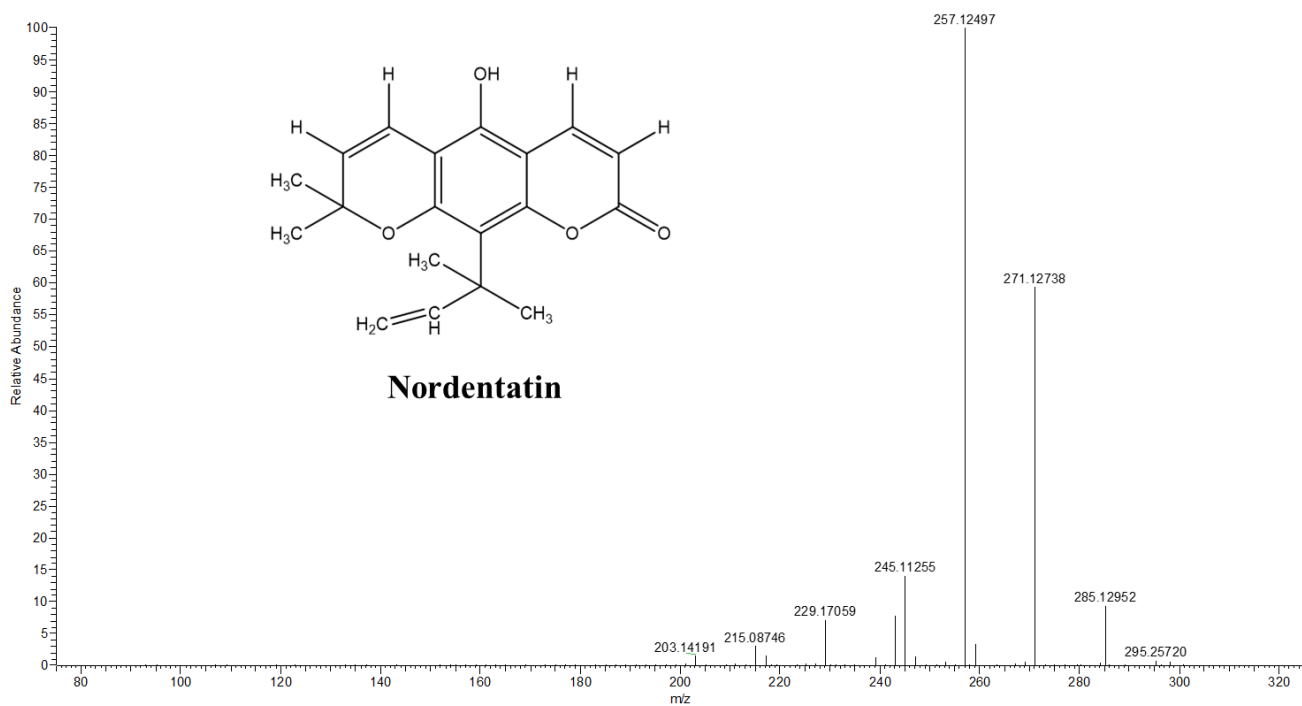

**Figure S2.** Total ion chromatography (upper) and tandem mass spectrometry (MS-MS) spectrum (lower) of nordentatin by a positive model

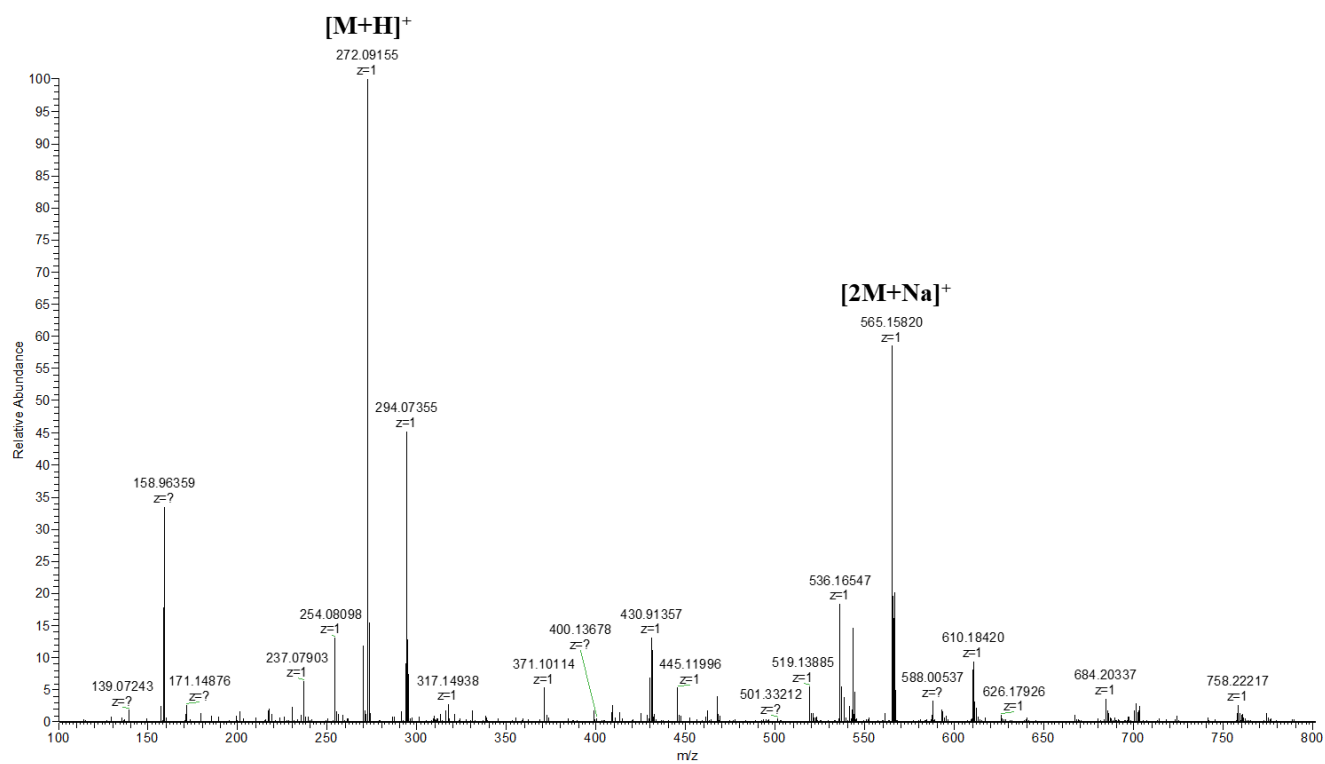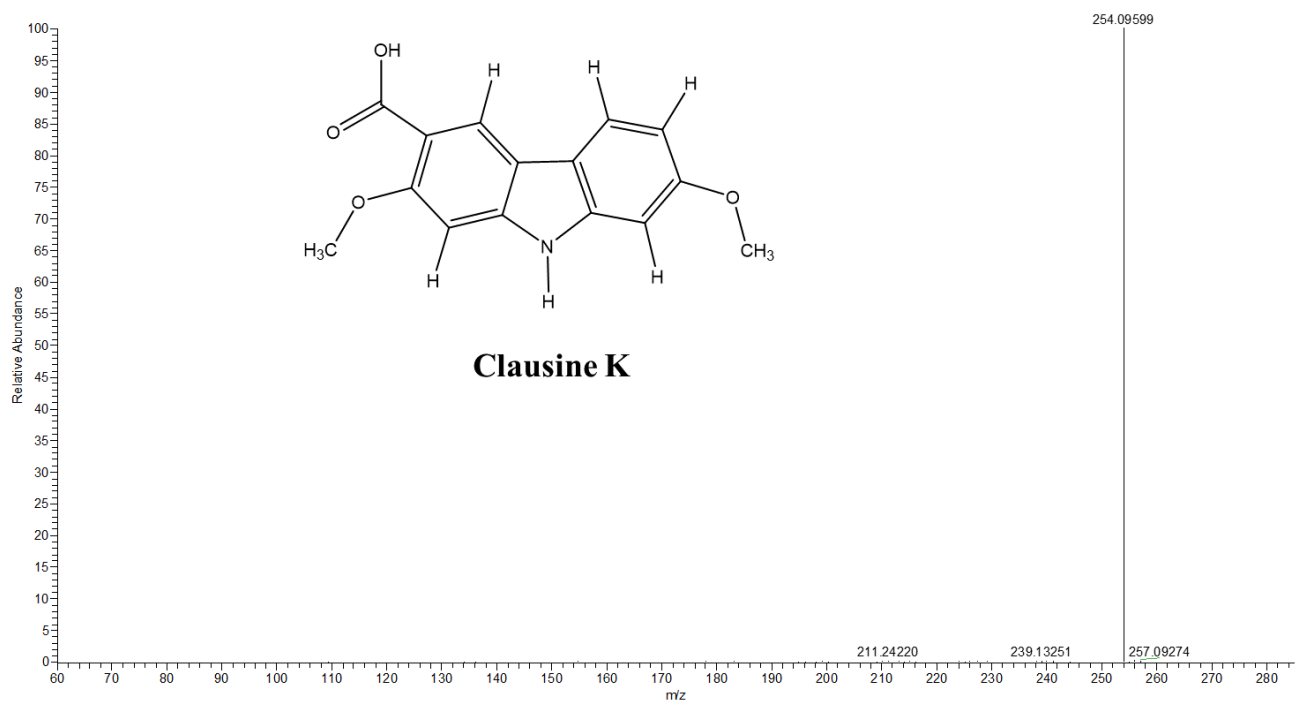

**Figure S3.** Total ion chromatography (upper) and tandem mass spectrometry (MS-MS) spectrum (lower) of clausine K by a positive model

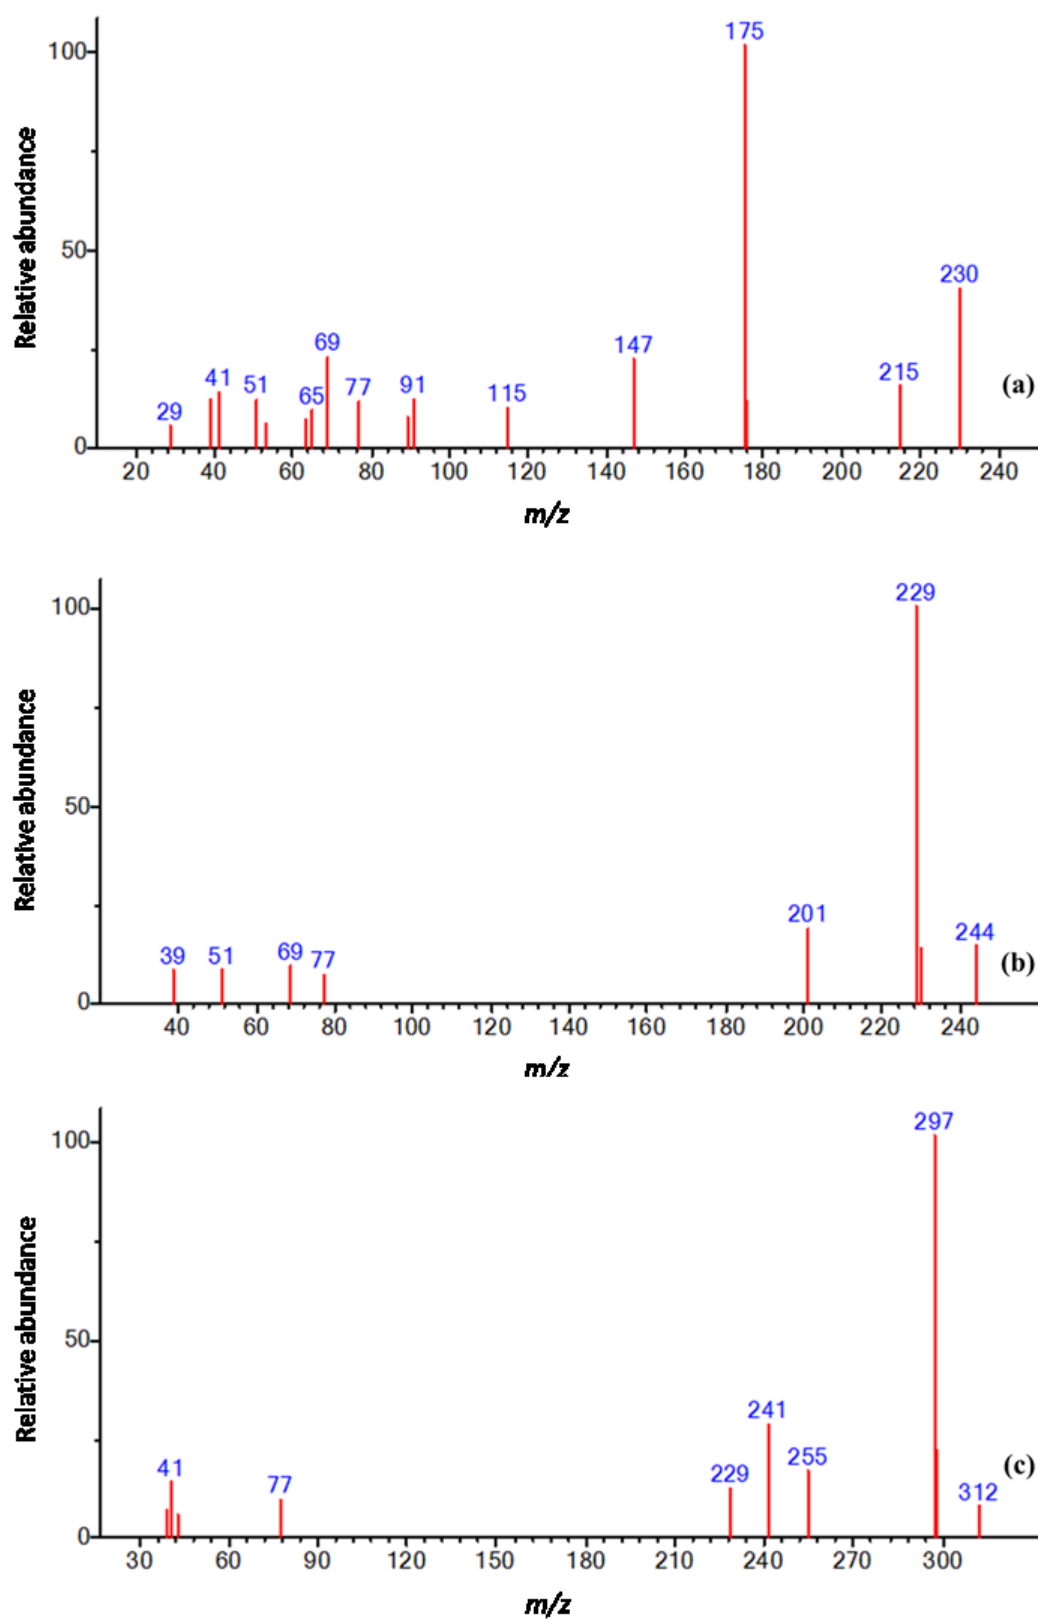

**Figure S4.** GC-MS fragmentation patterns of UC1 (a), UC2 (b), and UC3 (c) detected in *Clausena indica* roots
