# Supplementary material for: Bio-Guided Isolation of Prospective Bioactive Constituents from Roots of Clausena indica (Dalzell) Oliv
Source: MDPI journal article supplement (doi:10.3390/molecules24244442), 2019-12-04
Supplement: s1 [file s1]

**Table S1.**  $^1\text{H}$  (400 MHz,  $\text{CDCl}_3$ ) and  $^{13}\text{C}$  (101 MHz,  $\text{CDCl}_3$ ) NMR spectral data of dentatin

| Position           | $\delta_{\text{H}}$ (mult., $J$ in Hz) | $\delta_{\text{C}}$ |
|--------------------|----------------------------------------|---------------------|
| 1a                 |                                        | 154.01              |
| 2                  |                                        | 160.75              |
| 3                  | 6.19 (1H, d, 9.6)                      | 111.71              |
| 4                  | 7.87 (1H, d, 9.7)                      | 138.92              |
| 4a                 |                                        | 107.55              |
| 5                  |                                        | 151.27              |
| 5a                 |                                        | 108.3               |
| 6                  | 6.57 (1H, d, 9.9)                      | 116.36              |
| 7                  | 5.70 (1H, d, 10.0)                     | 130.40              |
| 8                  |                                        | 77.39               |
| 9a                 |                                        | 156.04              |
| 10                 |                                        | 119.24              |
| 1'                 |                                        | 41.20               |
| 2'                 | 6.31 (1H, dd, 17.4, 10.6)              | 149.86              |
| 3'                 |                                        | 108.21              |
| 3'a                | 4.88 (1H, d, 10.5)                     |                     |
| 3'b                | 4.94 (1H, d, 17.4)                     |                     |
| 4' and 5'          | 1.69 (6H, s)                           | 29.44               |
| $\text{OCH}_3$     | 3.83 (3H, s)                           | 63.43               |
| $2\text{CH}_3 - 8$ | 1.45 (6H, s)                           | 27.57               |

**Table S2.**  $^1\text{H}$  (400 MHz,  $\text{CDCl}_3$ ) and  $^{13}\text{C}$  (101 MHz,  $\text{CDCl}_3$ ) NMR spectral data of nordentatin

| Position           | $\delta_{\text{H}}$ (mult., $J$ in Hz) | $\delta_{\text{C}}$ |
|--------------------|----------------------------------------|---------------------|
| 1a                 |                                        | 154.19              |
| 2                  |                                        | 161.42              |
| 3                  | 6.17 (1H, d, 9.6)                      | 110.34              |
| 4                  | 8.05 (1H, d, 9.6)                      | 139.14              |
| 4a                 |                                        | 103.86              |
| 5                  |                                        | 146.53              |
| 5a                 |                                        | 106.03              |
| 6                  | 6.53 (1H, d, 9.9)                      | 114.90              |
| 7                  | 5.72 (1H, d, 9.9)                      | 130.04              |
| 8                  |                                        | 77.10               |
| 9a                 |                                        | 155.91              |
| 10                 |                                        | 116.23              |
| 1'                 |                                        | 41.03               |
| 2'                 | 6.30 (1H, dd, 17.4, 10.5)              | 150.06              |
| 3'                 |                                        | 108.07              |
| 3'a                | 4.88 (1H, d, 10.6)                     |                     |
| 3'b                | 4.94 (1H, d, 17.4)                     |                     |
| 4' and 5'          | 1.64 (6H, s)                           | 29.56               |
| OH                 | 5.93 (1H, s)                           |                     |
| $2\text{CH}_3 - 8$ | 1.46 (6H, s)                           | 27.30               |

**Table Table S3.** <sup>1</sup>H (400 MHz, DMSO) and <sup>13</sup>C (101 MHz, DMSO) NMR spectral data of clausine-K

| Position            | $\delta_{\text{H}}$ (mult., <i>J</i> in Hz) | $\delta_{\text{C}}$ |
|---------------------|---------------------------------------------|---------------------|
| 1                   | 7.03 (1H, s)                                | 94.39               |
| 1a                  |                                             | 143.87              |
| 2                   |                                             | 157.81              |
| 3                   |                                             | 112.73              |
| 4                   | 8.39 (1H, s)                                | 123.60              |
| 4a                  |                                             | 116.22              |
| 5                   | 7.95 (1H, d, 8.5)                           | 120.94              |
| 5a                  |                                             | 116.76              |
| 6                   | 6.78 (1H, dd, 8.5, 2.3)                     | 108.58              |
| 7                   |                                             | 158.57              |
| 8                   | 6.98 (1H, d, 2.2)                           | 95.51               |
| 8a                  |                                             | 142.06              |
| NH                  | 11.28 (1H, br. s)                           |                     |
| COOH                | 12.11 (1H, s)                               | 167.91              |
| OCH <sub>3</sub> -2 | 3.89 (3H, s)                                | 56.41               |
| OCH <sub>3</sub> -7 | 3.83 (3H, s)                                | 55.76               |
