# Supplementary material for: Bio-Guided Isolation of Prospective Bioactive Constituents from Roots of Clausena indica (Dalzell) Oliv
Source: MDPI journal article supplement (doi:10.3390/molecules24244442), 2019-12-04
Supplement: s1 [file s1]

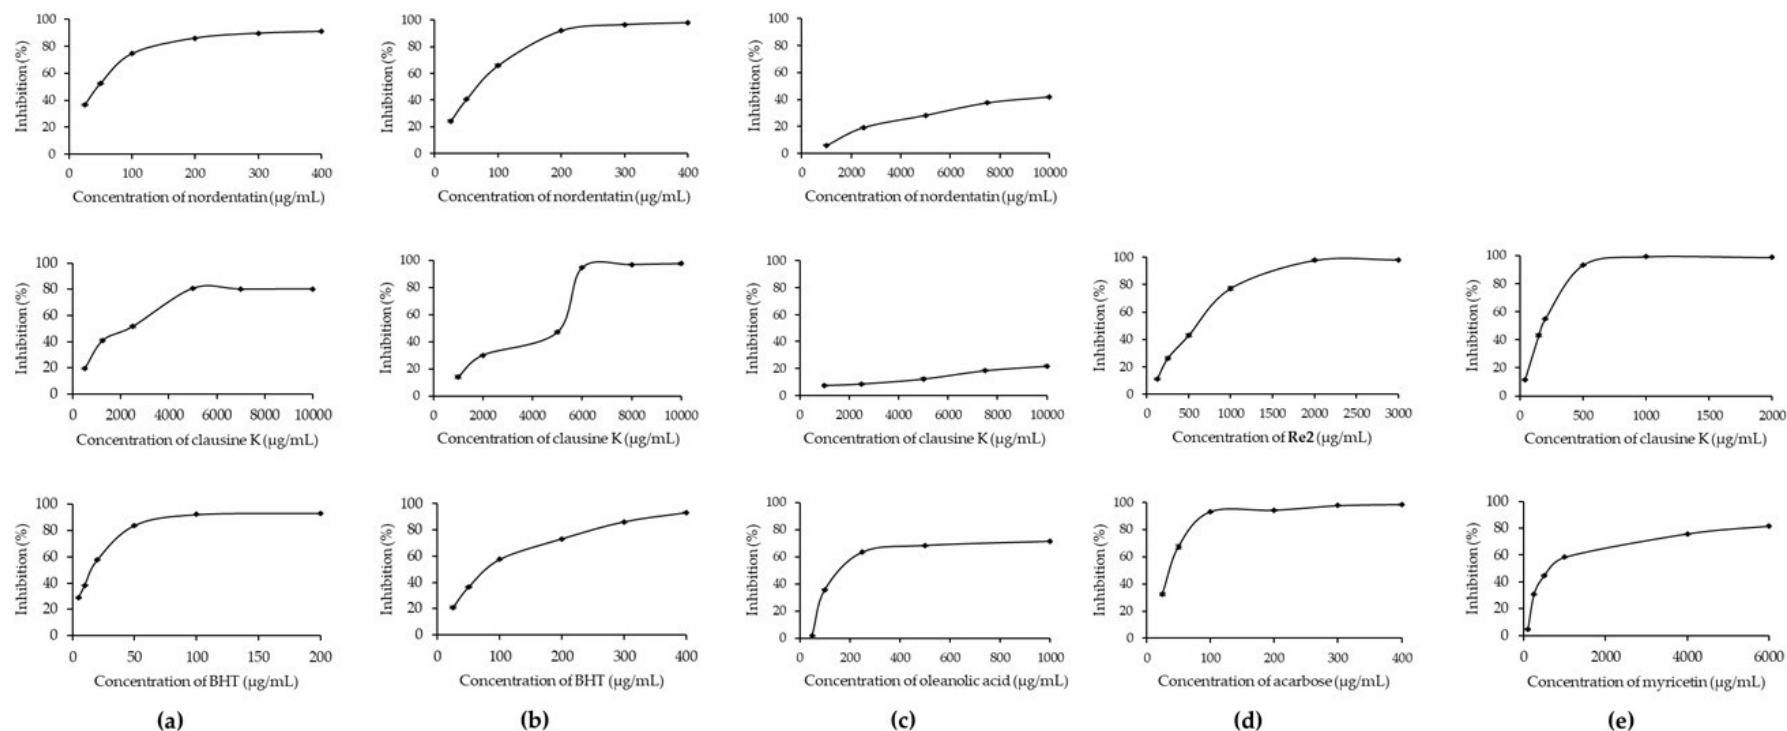

**Figure S5.** Dose response curves for biological activities of major active constituents isolated from *Clausena indica* roots and positive controls. The results are presented as mean  $\pm$  standard error (n=3). BHT, butylated hydroxytoluene. **(a)** DPPH radical scavenging activity; **(b)** ABTS radical scavenging activity; **(c)** elastase inhibitory activity; **(d)**  $\alpha$ -amylase inhibitory activity; **(e)** tyrosinase inhibitory activity.

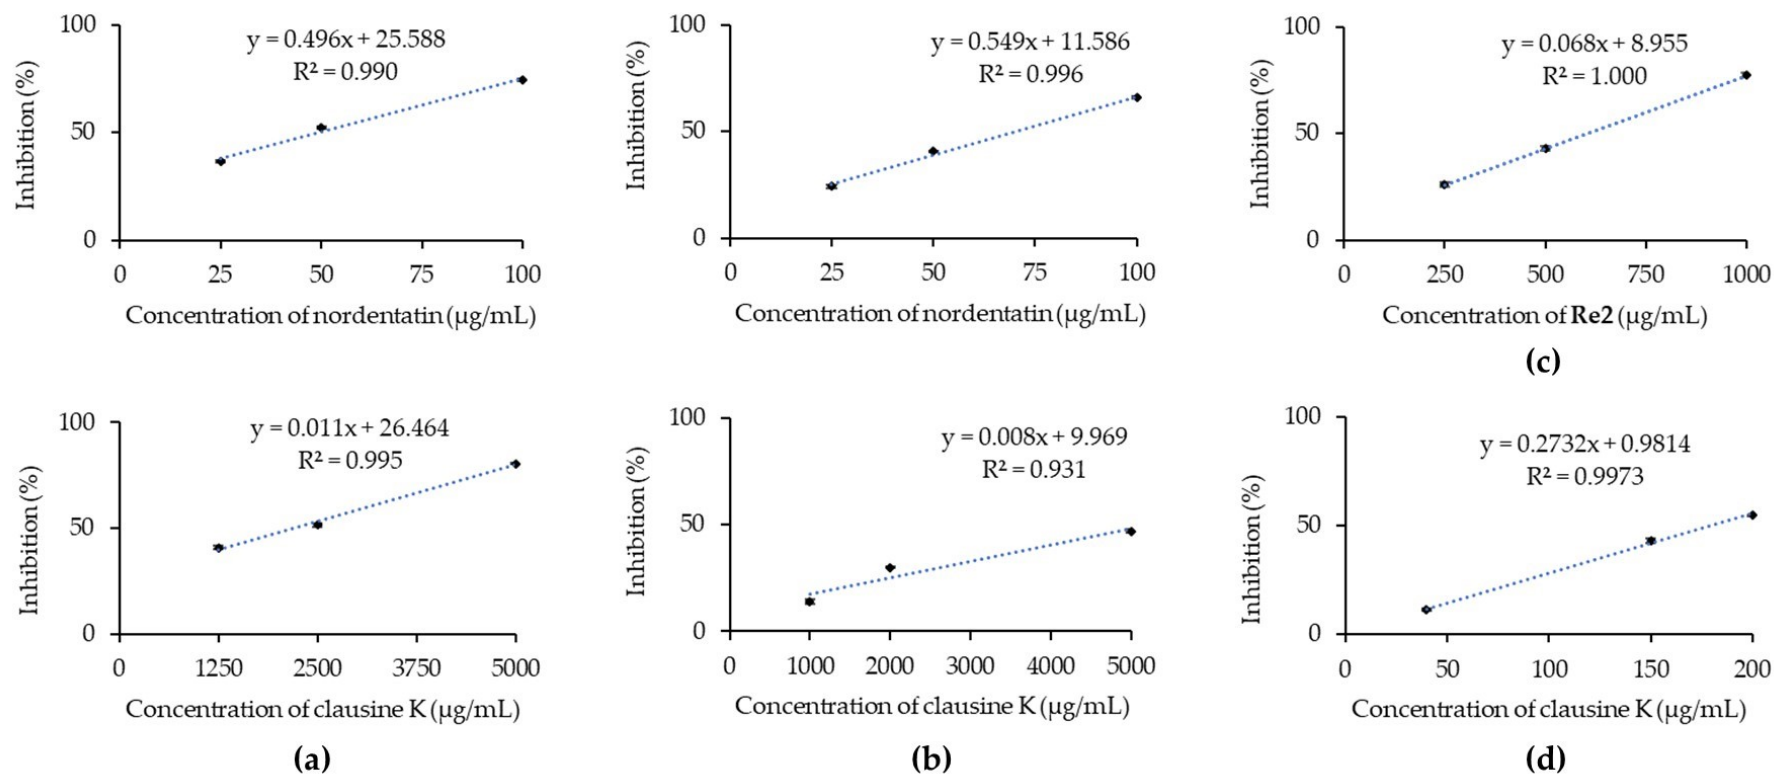

**Figure S6.** Linear curves used to calculate  $IC_{50}$  of biological activities of major active constituents isolated from *Clausena indica* roots. The results are presented as mean  $\pm$  standard error ( $n=3$ ). **(a)** DPPH assay for nordentatin (upper) and clausine K (lower); **(b)** ABTS assay for nordentatin (upper) and clausine K (lower); **(c)**  $\alpha$ -amylase assay for fraction **Re2**; **(d)** tyrosinase assay for clausine K.
